# Supplementary material
Source: PubMed Central journal article supplement (PMC520936)
Supplement: plntcell_tpc.104.024844_1.pdf [file plntcell_tpc.104.024844_1.pdf]

---

**Supplemental Table 1.** Sequences of Forward and Reverse Primers and Oligo Probes Used in TaqMan RT-PCR

---

| Gene             | Oligonucleotide | Sequence                          |
|------------------|-----------------|-----------------------------------|
| <i>GaRDL1</i>    | Forward         | 5'-ATACGTTTTTCATCTGACAAGTTGC-3'   |
|                  | Reverse         | 5'-CAGCTGCTATTGTATACTTTTGCA-3'    |
|                  | Probe           | 5'-AGTGCGAACAGCCAGCGATTGAAG-3'    |
| <i>GaMYB2</i>    | Forward         | 5'-CAGCATTGATGTGGACGAATTCT-3'     |
|                  | Reverse         | 5'-CCAAGGAAACATGTTAATTACAAACT-3'  |
|                  | Probe           | 5'-ACGGAAGGTTGCTTTGGTTTGGATT-3'   |
| <i>GaHOX3</i>    | Forward         | 5'-ATTTCTTCAAAGATGAAAGAACTAGA-3'  |
|                  | Reverse         | 5'-GGCTCGTAAAACGGATATACAGT-3'     |
|                  | Probe           | 5'-CAACGGCAACGCAGTCCAAGAAGT-3'    |
| <i>Histone 3</i> | Forward         | 5'-CGGTGGTGTGAAGAAGCCTCAT-3'      |
|                  | Reverse         | 5'-AATTTACGAACAAGCCTCTGGAA-3'     |
|                  | Probe           | 5'-CGAAGAGCAACAGTTCCAGGACGGTAT-3' |

---
