# Supplementary material
Source: PubMed Central journal article supplement (PMC520936)
Supplement: plntcell_tpc.104.024844_2.pdf [file plntcell_tpc.104.024844_2.pdf]

**Supplementary Table 2. PCR Primers Used**

| Name           | Sequence                                                         |
|----------------|------------------------------------------------------------------|
| RDL1-P1-F      | 5'-GAGAAGCTTCTAGAGTTGCATCATGTT-3'                                |
| RDL1-P2-F      | 5'-GAGAAGCTTAAAATATGATAACCTCTTAATCCACT-3'                        |
| RDL1-P3-F      | 5'-GAGAAGCTTAATTAGTTATGTTTGGTAAATGAATTTG-3'                      |
| RDL1-P3-BC-F   | 5'-GAGAAGCTTACCTAAGCCCATGACATAAACTGCA-3'                         |
| RDL1-P-121-R   | 5'-ACAGGATCCCTAGAACAGGAGTGACTAATTCTA-3'                          |
| RDL1-P-1301-R  | 5'-ACACCATGGCTAGAACAGGAGTGACTAATTCTA-3'                          |
| RDL1-P3-A-R    | 5'-ACACTGCAGTGCAGTTTATGTCATGGGCTTAGGT-3'                         |
| RDL1-P3-AB-R   | 5'-ACACTGCAGCACTGCCAACAATATTTTTCAACCA-3'                         |
| RDL1-P3-TATA-F | 5'-ACACTGCAGTATAAATGTGGAGAAATCTTGTTCTACT-3'                      |
| RDL1-SCAN-1-F  | 5'-GCGAAGCTTAATTGGAATTCCTTGGTAAATGAATTTGAATACA<br>TG-3'          |
| RDL1-SCAN-2-F  | 5'-GCGAAGCTTAATTAGTTATGTTTGGGCTGCAGCTTTGAATACA<br>TGCACCACCAC-3' |
| RDL1-SCAN-3-F  | 5'-TAGGAATTCCCACCACCCTCTCAATGCTC-3'                              |
| RDL1-SCAN-3-R  | 5'-TAGGAATTCCCAAATTCATTTACCAAACATAACT-3'                         |
| RDL1-SCAN-4-F  | 5'-TAGGAATTCCCAATGCTCACCCACCTAAGC-3'                             |
| RDL1-SCAN-4-R  | 5'-TAGGAATTCCGGTGCATGTATTCAAATTCATTT-3'                          |
| RDL1-SCAN-5-F  | 5'-TATGAATTCAACCTAAGCCCATGACATAAAC-3'                            |
| RDL1-SCAN-5-R  | 5'-TATGAATTCAATTGAGAGTGGTGGTGCATG-3'                             |
| RDL1-SCAN-6-F  | 5'-TAGGAATTCCGACATAAACTGCATTTAAGTGAA-3'                          |
| RDL1-SCAN-6-R  | 5'-TAGGAATTCCAGGTGGGTGAGCATTGAGAG-3'                             |
| RDL1-SCAN-7-F  | 5'-TACCTGCAGGATTTAAGTGAACCAAGTGGCAG-3'                           |
| RDL1-SCAN-7-R  | 5'-TACCTGCAGGTGTCATGGGCTTAGGTGGG-3'                              |
| RDL1-SCAN-8-F  | 5'-TATGAATTCACAGTGGCAGTTGGAGCCAT-3'                              |
| RDL1-SCAN-8-R  | 5'-TATGAATTCAAATGCAGTTTATGTCATGGGC-3'                            |
| RDL1-SCAN-9-F  | 5'-TATCTGCAGAGAGCCATTATGTTGGTTGAAAA-3'                           |
| RDL1-SCAN-9-R  | 5'-TATCTGCAGAACTGGTTCCTTAAATGCAGTT-3'                            |
| RDL1-SCAN-10-F | 5'-TAGGAATTCCTGGTTGAAAAATATTGTTGGCAG-3'                          |
| RDL1-SCAN-10-R | 5'-TAGGAATTCGCTCCAACCTGCCACTGGTT-3'                              |
| RDL1-SCAN-11-F | 5'-TACCTGCAGGATTGTTGGCAGTGTTATTCAGC-3'                           |
| RDL1-SCAN-11-R | 5'-TACCTGCAGGACCAACATAATGGCTCCAAC-3'                             |
| RDL1-SCAN-12-F | 5'-TAGGAATTCGTTATTCAGCAGTACTTGTCTAA-3'                           |
| RDL1-SCAN-12-R | 5'-TAGGAATTCCTAATATTTTTCAACCAACATAATG-3'                         |
| RDL1-SCAN-13-F | 5'-TATCTGCAGAGTTCTACTTTCCATTCCATGC-3'                            |
| RDL1-SCAN-13-R | 5'-TATCTGCAGACCACATTTATAATGAGAAATGTA-3'                          |
| RDL1-SCAN-14-F | 5'-TATCTGCAGACATTCCATGCAACACTAATTTT-3'                           |
| RDL1-SCAN-14-R | 5'-TATCTGCAGAAACAAGATTTCTCCACATTTATAA-3'                         |
| RDL1-SCAN-15-F | 5'-TAGGAATTCCTACTAATTTTAGATTCCCTTTC-3'                           |
| RDL1-SCAN-15-R | 5'-TAGGAATTCCTAATGGAAAGTAGAACAAGATTTTC-3'                        |
| RDL1-SCAN-16-F | 5'-TAGCTGCAGCGATTCCCTTTCCATTGCACTG-3'                            |
| RDL1-SCAN-16-R | 5'-TAGCTGCAGCAGTGTTGCATGGAATGGAAAG-3'                            |
| RDL1-SCAN-17-F | 5'-TAGCTGCAGCATTGCACTGCTCTTTCTTTCT-3'                            |

|                         |                                                                        |
|-------------------------|------------------------------------------------------------------------|
| RDL1-SCAN-17-R          | 5'-TAGCTGCAGCAATCTAAAAGTTAGTGTTGCATG-3'                                |
| RDL1-SCAN-18-F          | 5'-TATGAATTCATTTCTTTCTATAGAATTAGTCAC-3'                                |
| RDL1-SCAN-18-R          | 5'-TATGAATTCACAATGGAAAGGGAATCTAAAAG-3'                                 |
| RDL1-SCAN-19-R          | 5'-ACAGGATCCCTAGAACAGGAGTGACTAATTCGCTGCAGCGA<br>AAGAGCAGTGCAATGGAAA-3' |
| RDL1-SCAN-20-R          | 5'-ACAGGATCCCTAGAACAGGGGAATTCCATTCTATAGAAAGAA<br>AGAGCAGT-3'           |
| RDL1-P3-L1-MU-F         | 5'-TAAACTGCAGTTAAGTGAACCAGTGGCAGT-3'                                   |
| RDL1-P3-L1-MU-R         | 5'-TAACTGCAGTTTATGTCATGGGCTTAGGTGG-3'                                  |
| RDL1-P3-MYB-MU-R        | 5'-CAACCAACATAATGGCTCCCACTGCCACTG-3'                                   |
| RDL1-OH-F               | 5'-TATGAATTC AATTAGTTATGTTTGGTAAATGAATTTGAA-3'                         |
| RDL1-OH-XbaI-R          | 5'-GAGTCTAGAATGAGAAATGTAGTAGGAGCCTTAGA-3'                              |
| RDL1-OH-SalI-R          | 5'-GAGGTCGACATGAGAAATGTAGTAGGAGCCTTAGA-3'                              |
| GaMYB2-CDS-SalI-F       | 5'-TATGTGACCTATGGCTCCAAAGAAGGATGGAGTG-3'                               |
| GaMYB2-CDS-PstI-R       | 5'-TATCTGCAGTTATTATACCATTGCTAATGGATCCTG-3'                             |
| GaMYB1-CDS-EcoRI-F      | 5'-TATGAATTCATGGGACGATCACCTTGTTGTGAAA-3'                               |
| GaMYB1-CDS-PstI-R       | 5'-TATCTGCAGCTATGAATCCAAGGGTCTACAATAAC-3'                              |
| GaMYB109-CDS-SalI-F     | 5'-TATGTGACCTATGTCCATGAAAAAAGAAGGTGAAATTCTA-3'                         |
| GaMYB109-CDS-PstI-<br>R | 5'-TATCTGCAGCTAGCTAAGATGAAAAGAAGAACATTCA-3'                            |
| GL1-CDS-EcoRI-F         | 5'-TATGAATTCATGAGAATAAGGAGAAGAGATGAA-3'                                |
| GL1-CDS-SalI-F          | 5'-TATGTGACAAGGAATCAGAGAATAAAAAAGAATGAGAATAA<br>GGAGAAGAGATGAA-3'      |
| GL1-CDS-PstI-R          | 5'-TATCTGCAGCTAAAGGCAGTACTCAACATCTC-3'                                 |
| WER-CDS-EcoRI-F         | 5'-TATGAATTCATGAGAAaGAAAGTAAGTAGTAGTG-3'                               |
| WER-CDS-SalI-F          | 5'-TATGTGACATGAGAAaGAAAGTAAGTAGTAGTG-3'                                |
| WER-CDS-PstI- R         | 5'-TATCTGCAGTCAAAAACAGTGTCCATCTATAAAG-3'                               |
| HOX3-CDS-XbaI-F         | 5'-TATTCTAGAATGGATTGCGGAAGCGGCGGCGGCTTA-3'                             |
| HOX3-CDS-PstI-R         | 5'-TATCTGCAGTCAAGAACTAGGACCATTCAAAGCAGC-3'                             |
| GL2-CDS-KpnI-F          | 5'-TATGGTACCATGTCAATGGCCGTCGACATGT-3'                                  |
| GL2-CDS-BamHI-R         | 5'-TATGGATCCTCAGCAATCTTCGATTTGTAGACT-3'                                |
| GL1-P-5-UP-F            | 5'-GAGAAGCTTATAATTGTTTGTACTTTCTCGAGTTAG-3'                             |
| GL1-P-5-UP-R            | 5'-TATCTGCAGTCTTTTTTATTCTCTGATTCCTTCTATG-3'                            |
| GL1-P-3-DOWN-F          | 5'-TATGTGACTTGATGTTTTGAATTTGTCTTTGAATTTTT-3'                           |
| GL1-P-3-DOWN-R          | 5'-TATTCTAGATCGGTTAGGGTAGATTATATTGAATTG-3'                             |
| GaMYB2-IN-MU-F          | 5'-TGGAGCATTGGAATTAGAGGGTATTTTGTGTTTG-3'                               |
| GL1-IN-MU-F             | 5'-ATATAAATATATCTCAACTAGACTAAATTTGATT-3'                               |
| WER-IN-MU-F             | 5'-TGAATTAAGGTCCTCAACTAAATAATTGTATATG-3'                               |
| RDL1-Probe-F            | 5'-TGCAGCCAGTGAAACTCAAATCCAT-3'                                        |
| RDL1-Probe-R            | 5'-CCATTACCAAAAACATGATTCATGGAT-3'                                      |
| GaMYB2-Probe-F          | 5'-AACTTCCTCCTCGGAACAAATTGTGC-3'                                       |
| GaMYB2-Probe-R          | 5'-AGCTGGATACAGTAAGGCAGATGCTAT-3'                                      |
| GUS-GL1-IN-F            | 5'-TATCTGCAGATGGTAGATCTGAGGGTACTCTTCTCTCTCTC<br>GCGC-3'                |

|                 |                                                             |
|-----------------|-------------------------------------------------------------|
| GUS-GL1-IN-R    | 5'-GGACGGACGAGTCGTCGGTTCTATCAACGAATCAAATTTAGT<br>CTAA-3'    |
| GUS-GaMYB2-IN-F | 5'-TATCTgCAgATggTAgATCTgAggGTAATTTACTTTCTGTTGAAGA<br>GAA-3' |
| GUS-GaMYB2-IN-R | 5'-ggACggACgAgTCgTCggTTCTATACATCAAACAAAATAACCCG<br>T-3'     |
| GUS-CDS-F       | 5'-TATCTGCAGATGGTAGATCTGAGGGTAAATTTCT-3'                    |
| GUS-CDS-R       | 5'-TATGTCGACTCACACGTGGTGGTGGTGGTG-3'                        |

---
